# Supplementary material for: Dicationic oligotelluroxane or mononuclear telluronium cation? Elucidation of the true catalytic species and activation mechanism of the benzylic carbon-halogen bond
Source: Royal Society of Chemistry journal article supplement (doi:10.1039/d1cc06311a), 2021-01-01
Supplement: d1cc06311a1.pdf [file d1cc06311a1.pdf]

Supporting information available for

**Dicationic oligotelluroxane or mononuclear telluronium cation?  
Elucidation of true catalytic species and activation mechanism of  
benzylic carbon-halogen bond**

Koji Takagi, Nao Sakakibara, Shoko Kikkawa, and Seiji Tsuzuki

Table of contents

|                                                   |         |
|---------------------------------------------------|---------|
| S1. General                                       | .....2  |
| S2. Synthesis of dicationic oligotelluroxanes     | .....3  |
| S3. Decomposition of dicationic oligotelluroxanes | .....4  |
| S4. Ritter-like reaction                          | .....11 |
| S5. Proof of chalcogen bonding interaction        | .....16 |
| S6. Crystal structure analysis                    | .....17 |
| S7. Theoretical calculation                       | .....20 |
| S8. References                                    | .....24 |

## S1. General

Nuclear magnetic resonance (NMR) spectroscopies were obtained on a Bruker Ascend™400 FT-NMR Spectrometer.  $^1\text{H}$ - and  $^{13}\text{C}$ -NMR signals were referenced using a residual solvent peak as an internal standard.  $^{125}\text{Te}$ -NMR signals were externally referenced to 1.0 M solution of  $\text{K}_2\text{TeO}_3$  in  $\text{D}_2\text{O}$  (1737 ppm) against  $\text{Me}_2\text{Te}$ . Melting points (Mp) were determined on a Yanaco micro melting point apparatus MP-500D. Elemental analyses (EA) were performed on an Elementar vario EL cube in the CHN mode. All materials were obtained from commercial suppliers and used without purification unless otherwise noted. Anhydrous tetrahydrofuran (THF) and dichloromethane (DCM) were purchased from Kanto Chemical Co. Other solvents were dried and distilled following to standard methods, and stored under nitrogen atmosphere. **2Te(CH<sub>3</sub>)-TfO**,<sup>1</sup> **2Te(OCH<sub>3</sub>)-TfO**,<sup>2</sup> **2Te(CH<sub>3</sub>)-TFA**,<sup>3</sup> and **3Te(CH<sub>3</sub>)-TfO**<sup>4</sup> were prepared following or slightly modifying the previous reports. The purity of these compounds were completely ensured by the elemental analyses.

## S2. Synthesis of dicationic oligotelluroxanes

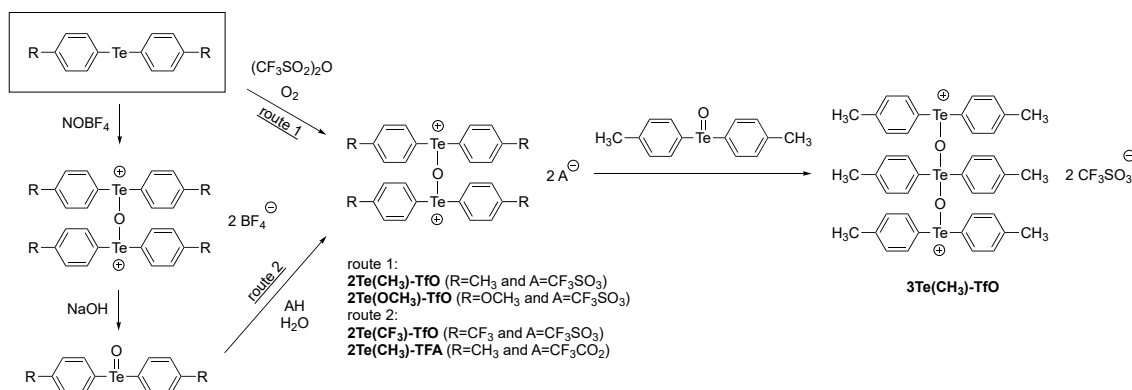

Scheme S1. Synthetic route to dicationic oligotelluroxanes.

### **2Te(CF<sub>3</sub>)-TfO** (new compound):

CF<sub>3</sub>SO<sub>3</sub>H (88 μL, 1.0 mmol) was added to a MeOH solution (10 mL) of bis(4-trifluoromethylphenyl)telluroxide (216 mg, 0.50 mmol)<sup>5</sup> at room temperature and the mixture was stirred for 1 h. After water (9 μL, 0.5 mmol) was added, the mixture was stirred for an additional 12 h. Solvent was removed, and the crude product was purified by recrystallization from ethyl acetate and hexane to obtain **2Te(CF<sub>3</sub>)-TfO** in 148 mg (52% yield). m.p. 259.5-261.0 °C (decomp.); <sup>1</sup>H-NMR (400 MHz, CD<sub>3</sub>CN) δ ppm 8.01 (d, J = 8.0 Hz, 4H), 7.94 (d, J = 8.0 Hz, 4H), 6.28 (s, 1H); <sup>13</sup>C NMR (100 MHz, CD<sub>3</sub>CN): δ ppm 140.5, 134.6, 134.2, 127.7, 126.0, 123.3; <sup>19</sup>F-NMR (376 MHz, CD<sub>3</sub>CN) δ ppm -63.84, -79.37; <sup>125</sup>Te-NMR (126 MHz, CD<sub>3</sub>CN) δ ppm 1252; Elemental analysis Calcd. for C<sub>30</sub>H<sub>28</sub>F<sub>6</sub>O<sub>7</sub>S<sub>2</sub>Te<sub>2</sub>: C, 38.59; H, 3.02; S, 6.87; Found: C, 38.46; H, 2.98; S, 6.41.

*Note:* Although the elemental analysis of an isolated solid product suggests the structure of **2Te(CF<sub>3</sub>)-TfO**, the solution-state spectra likely indicate the existence of hydroxy diaryltellurium cation obtained by the decomposition of **2Te(CF<sub>3</sub>)-TfO** (See the following section).

### S3. Decomposition of dicationic oligotelluroxanes

Ditelluroxane except for **2Te(CH<sub>3</sub>)-TFA**

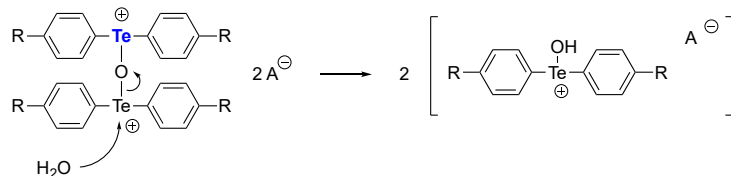

Tritelluroxane

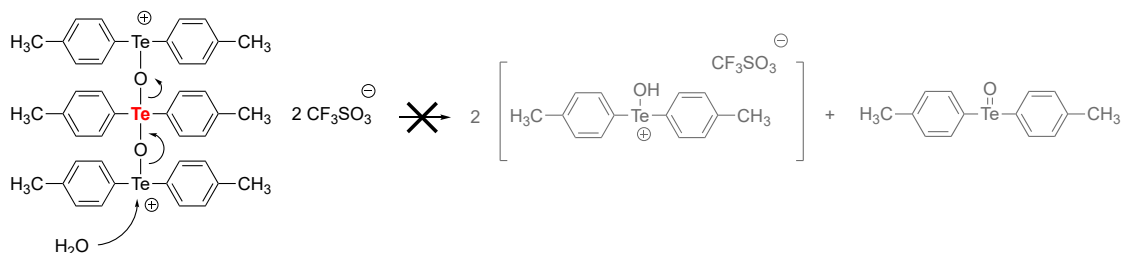

Scheme S2. Plausible decomposition mechanism. Because the cationic tellurium center of **2Te(CH<sub>3</sub>)-TFA** is occupied by the coordination of TFA anion, the nucleophilic attack by water may be partially inhibited in contrast to the other dicationic ditelluroxanes. On the other hand, red-letter tellurium atom in **3Te(CH<sub>3</sub>)-TfO** has a less electron-withdrawing character compared with blue-letter tellurium atom in **2Te(CH<sub>3</sub>)-TfO**, which may result in the water-resistant property of **3Te(CH<sub>3</sub>)-TfO**.

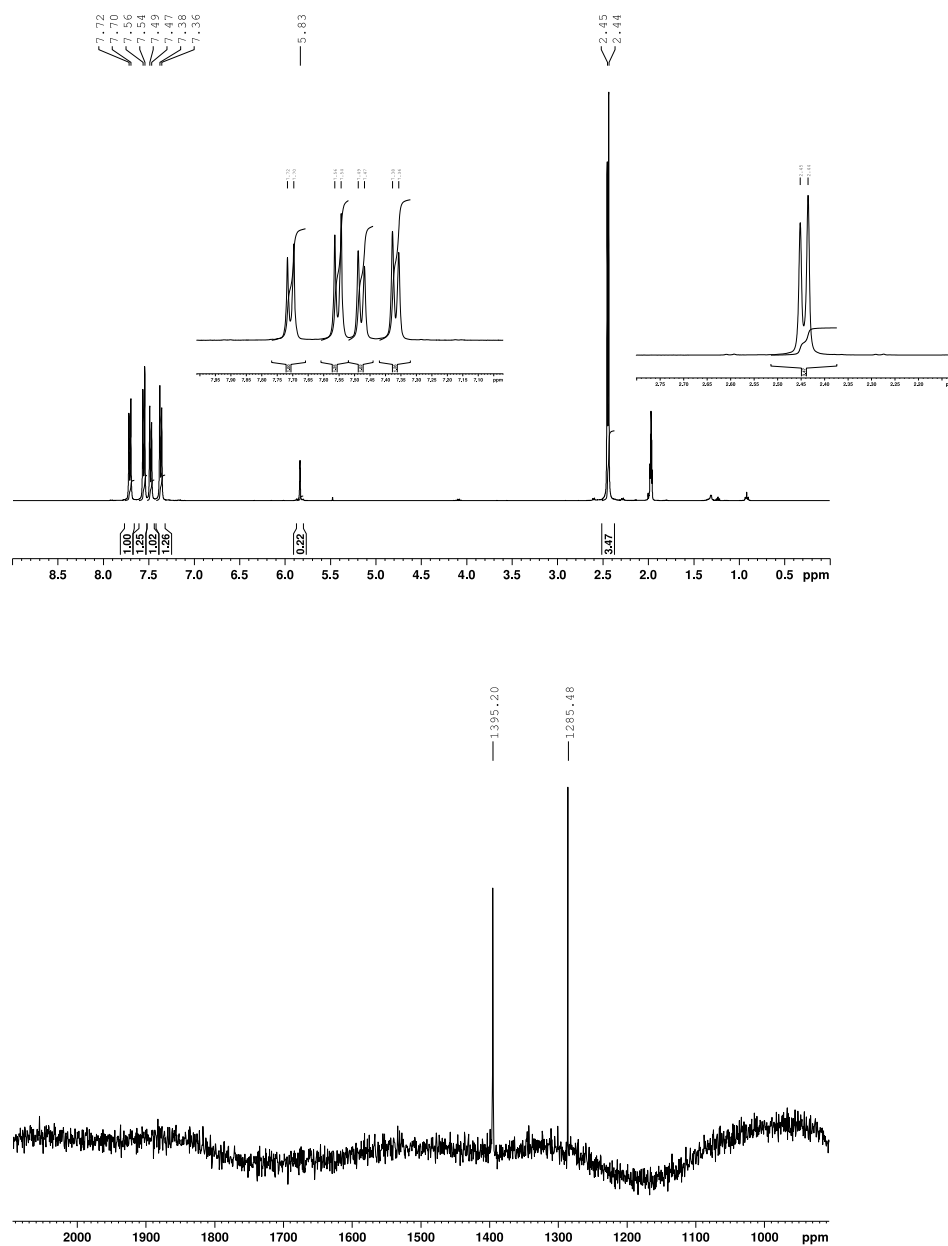

Figure S1.  $^1\text{H}$  and  $^{125}\text{Te}$  NMR spectra of  $2\text{Te}(\text{CH}_3)\text{-TfO}$  in dried  $\text{CD}_3\text{CN}$  (containing a trace amount of water).

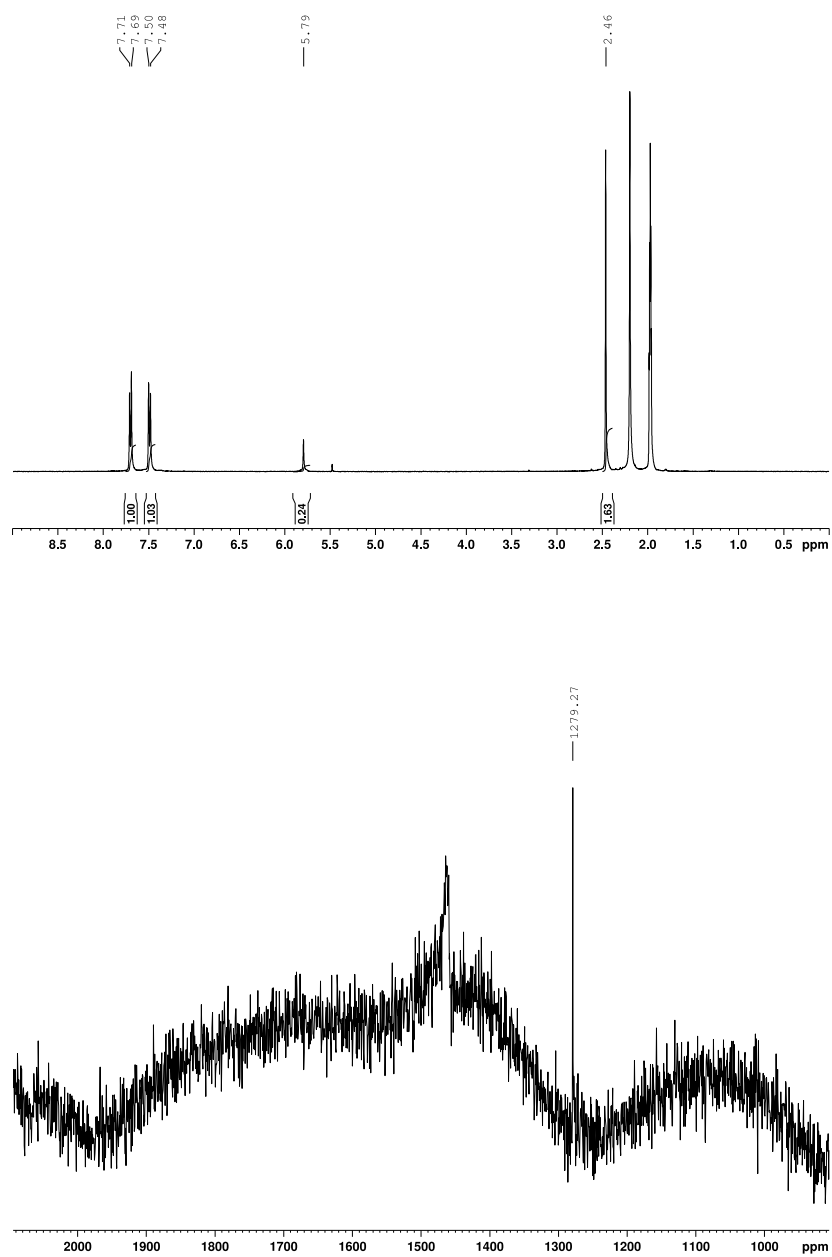

Figure S2.  $^1\text{H}$  and  $^{125}\text{Te}$  NMR spectra of  $2\text{Te}(\text{CH}_3)\text{-TfO}$  in wet  $\text{CD}_3\text{CN}$ .

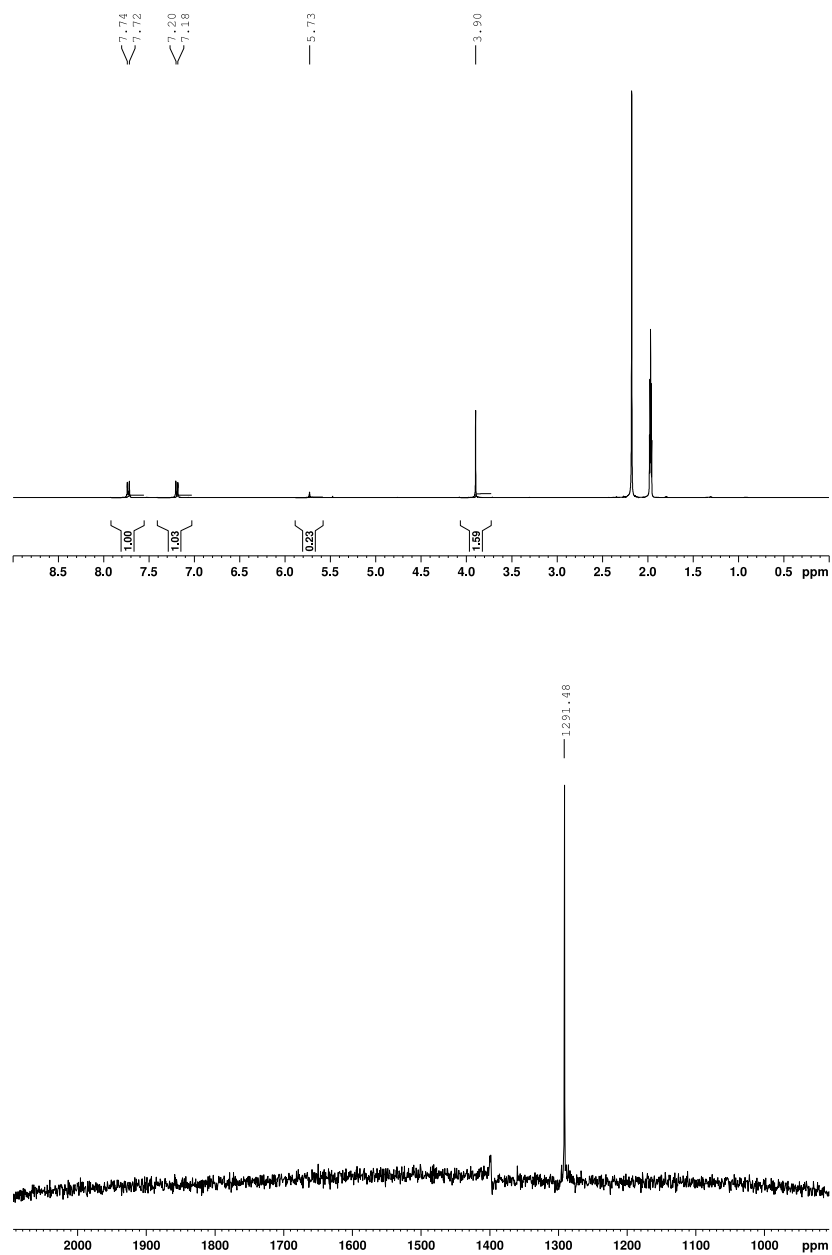

Figure S3. <sup>1</sup>H and <sup>125</sup>Te NMR spectra of **2Te(OCH<sub>3</sub>)-TfO** in wet CD<sub>3</sub>CN.

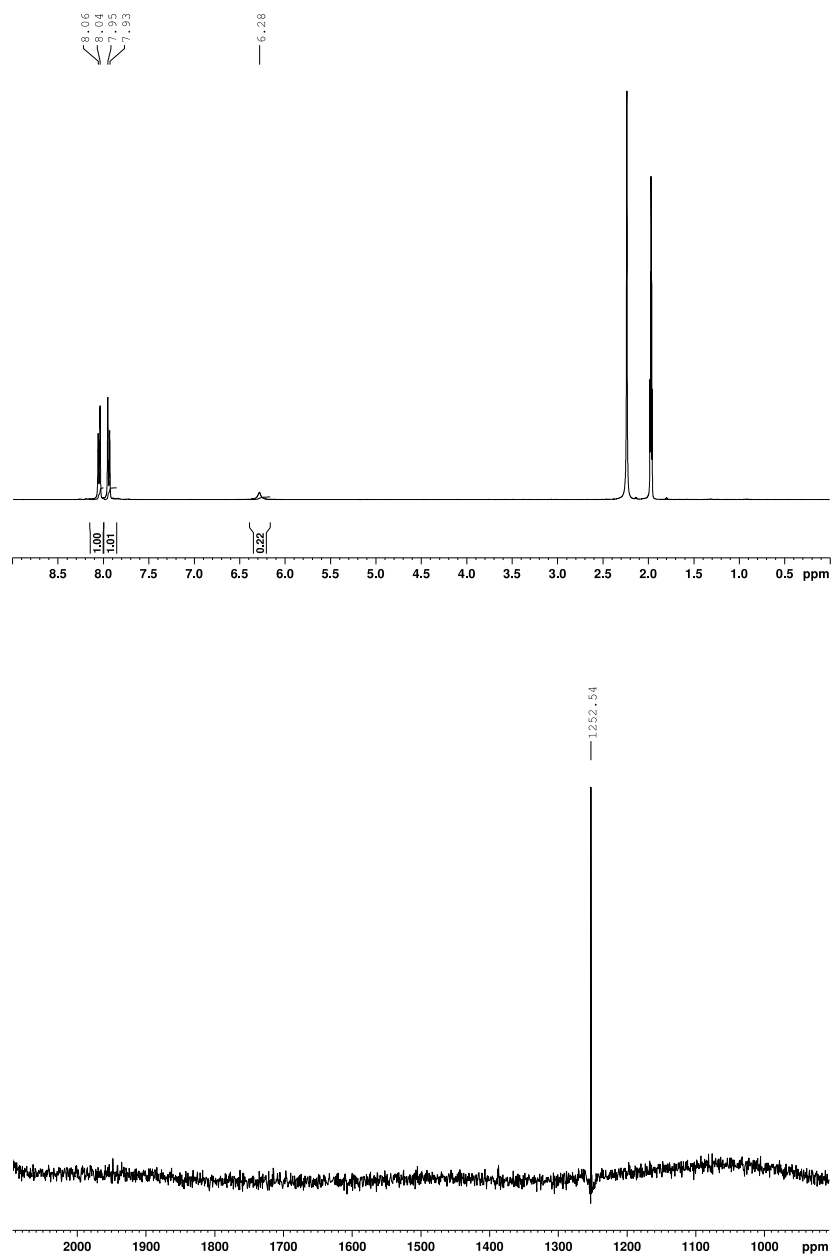

Figure S4. <sup>1</sup>H and <sup>125</sup>Te NMR spectra of **2Te(CF<sub>3</sub>)-TfO** in wet CD<sub>3</sub>CN.

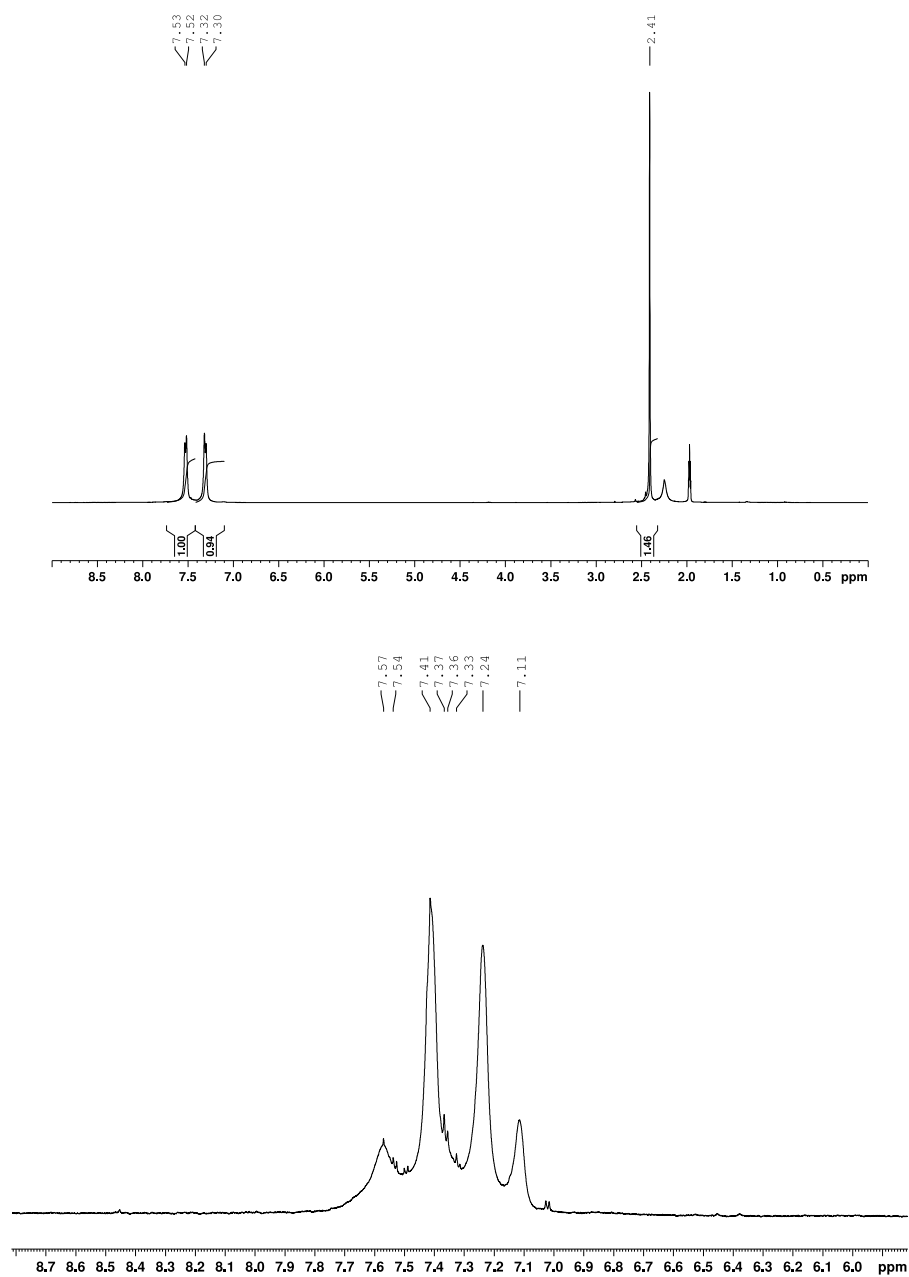

Figure S5.  $^1\text{H}$  NMR spectrum of  $3\text{Te}(\text{CH}_3)\text{-TfO}$  in wet  $\text{CD}_3\text{CN}$  at  $25\text{ }^\circ\text{C}$  (top) and  $-40\text{ }^\circ\text{C}$  (bottom, enlarged spectrum of aromatic region).

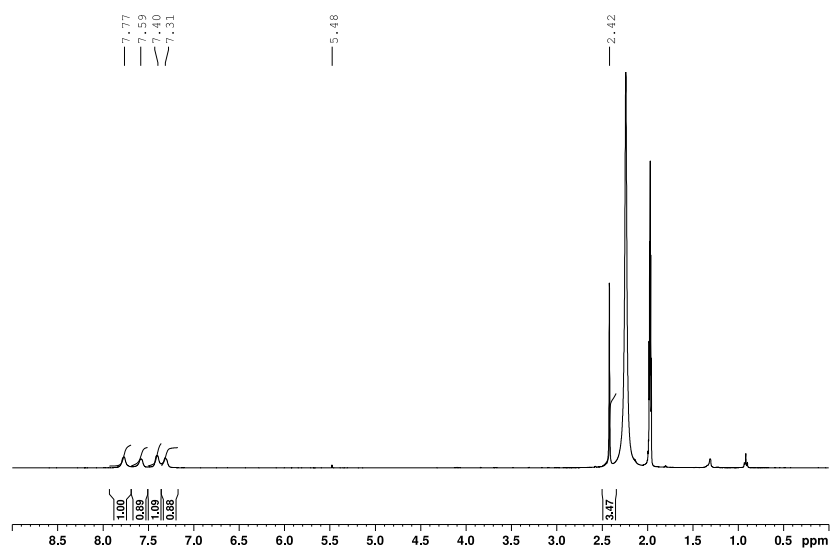

Figure S6.  $^1\text{H}$  NMR spectrum of  $2\text{Te}(\text{CH}_3)\text{-TFA}$  in wet  $\text{CD}_3\text{CN}$ .

## S4. Ritter-like reaction

Preparation of stock solution: In a two-necked test tube dried by using a heating gun, bromodiphenylmethane (37 mg, 150  $\mu$ mol) was dissolved in a mixture of  $\text{CD}_3\text{CN}$  (9 mL) and distilled water (8.1 mg, 3.0 equiv.). The solution was stored in a refrigerator.

Typical procedure of Ritter-like reaction: In a two-necked test tube dried by using a heating gun, organocatalyst (2  $\mu$ mol) and stock solution (0.6 mL) was mixed, and the solution was transferred into a well-dried NMR tube. The NMR spectra were collected after the designated reaction time.

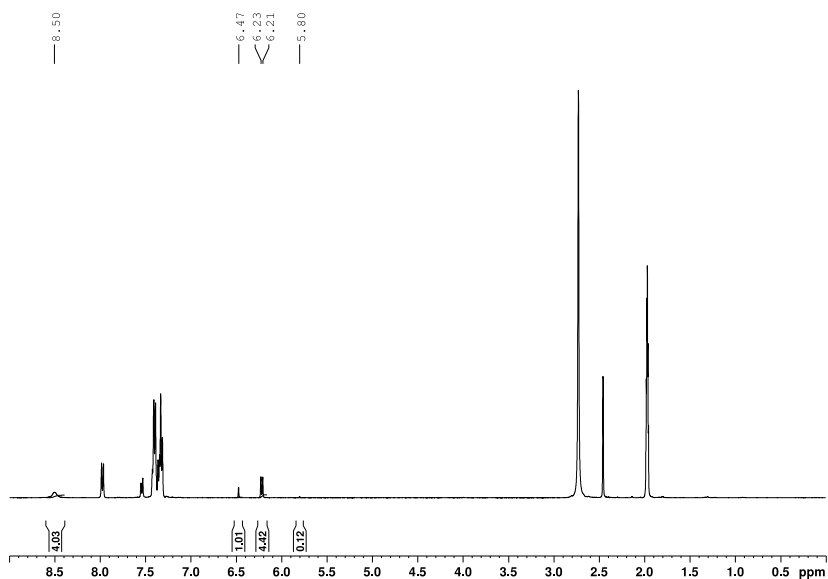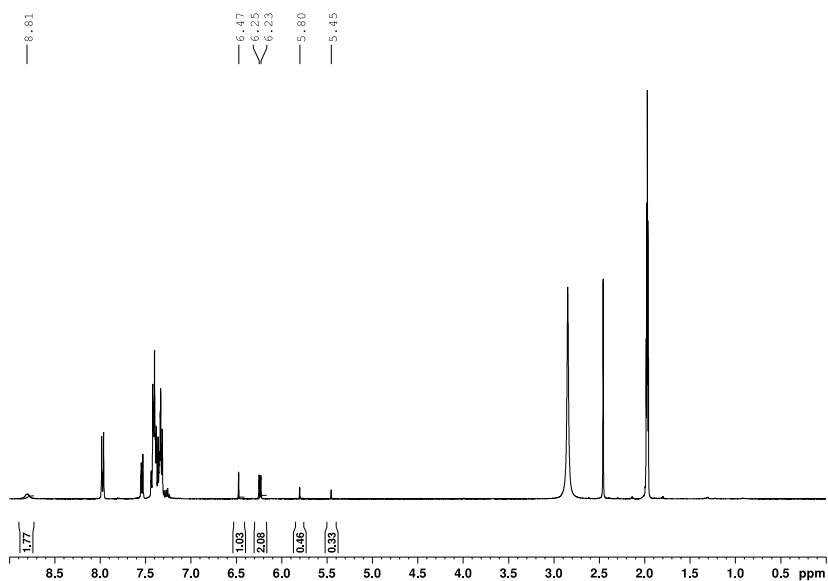

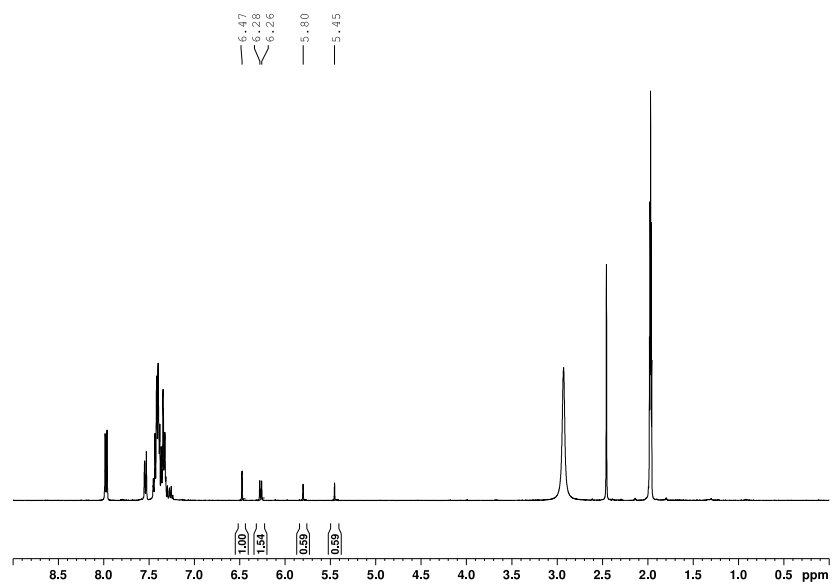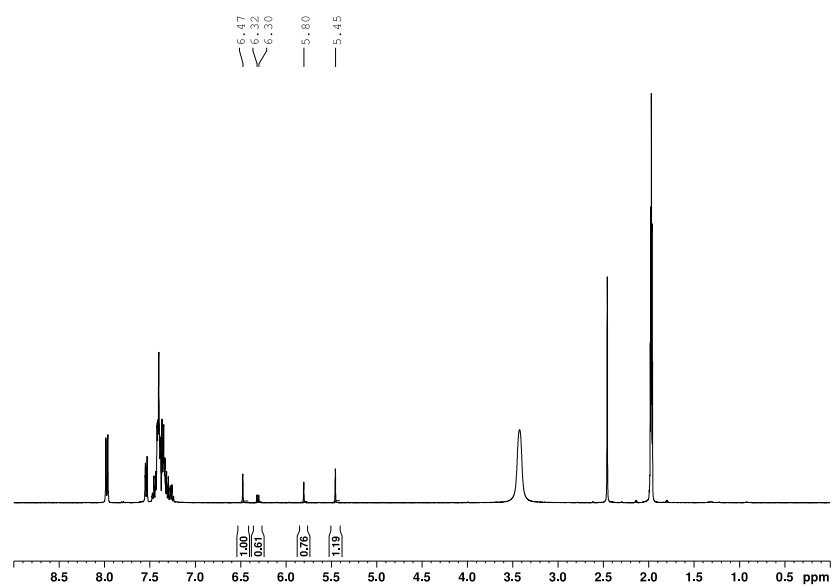

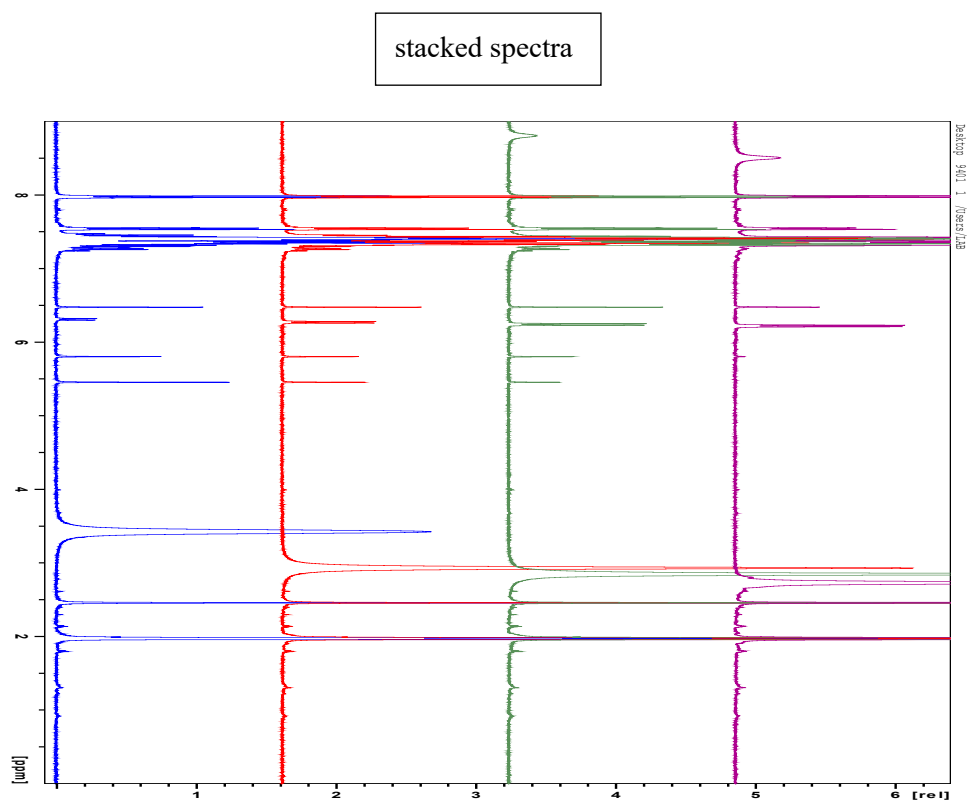

Figure S7. Selected  $^1\text{H}$  NMR spectra in the Ritter-like reaction of bromodiphenylmethane (**1**) using  $\text{Te}(\text{CH}_3)\text{-TfO}$  (40 mol%) as an organocatalyst. From bottom to top: 10 min, 2 h, 8 h, and 96 h.

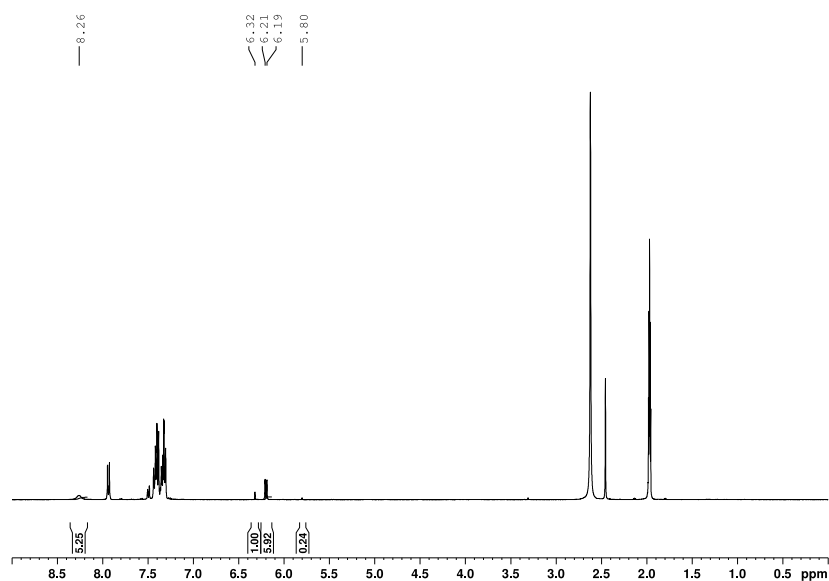

Figure S8.  $^1\text{H}$  NMR spectrum in the Ritter-like reaction of chlorodiphenylmethane (**2**) using  $\text{Te}(\text{CH}_3)\text{-TfO}$  (40 mol%) as an organocatalyst after 96 h.

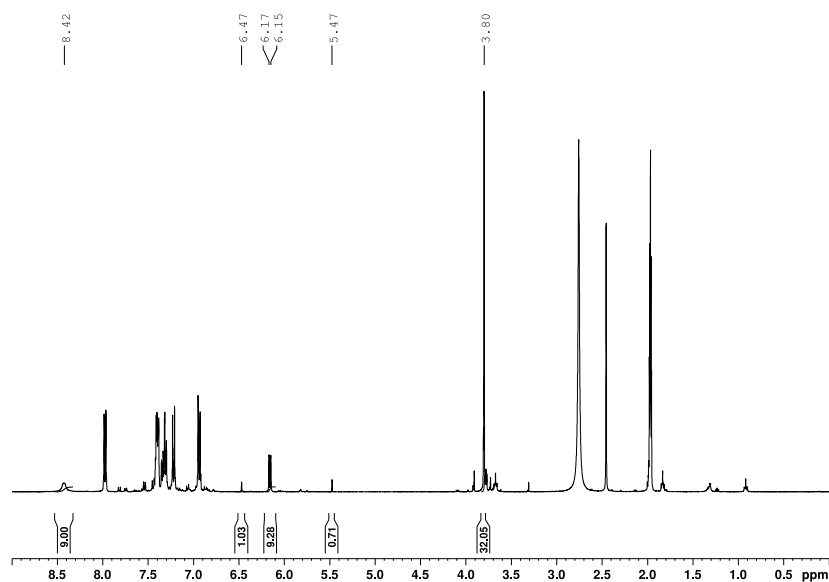

Figure S9.  $^1\text{H}$  NMR spectrum in the Ritter-like reaction of 4-methoxy bromodiphenylmethane (**3**) using  $\text{Te}(\text{CH}_3)\text{-TfO}$  (40 mol%) as an organocatalyst after 96 h.

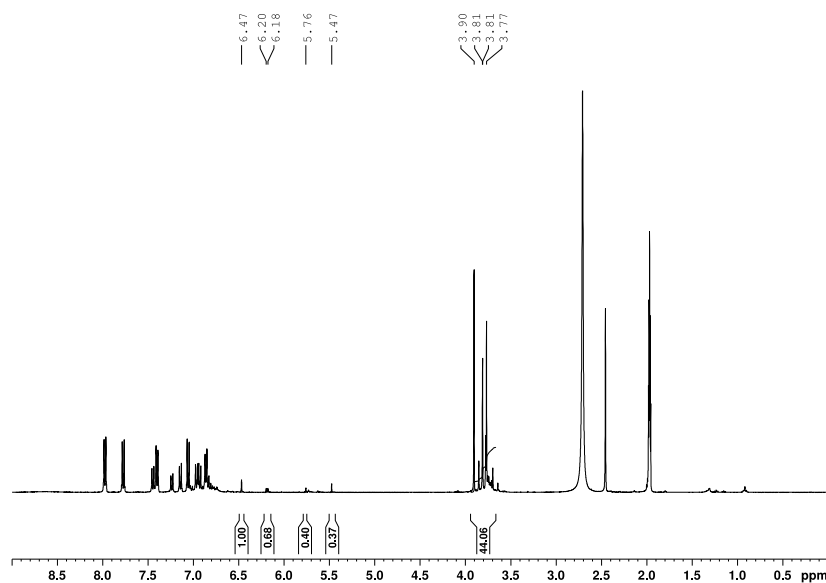

Figure S10.  $^1\text{H}$  NMR spectrum in the Ritter-like reaction of 4,4'-dimethoxy bromodiphenylmethane (**4**) using  $\text{Te}(\text{CH}_3)\text{-TfO}$  (40 mol%) as an organocatalyst after 96 h.

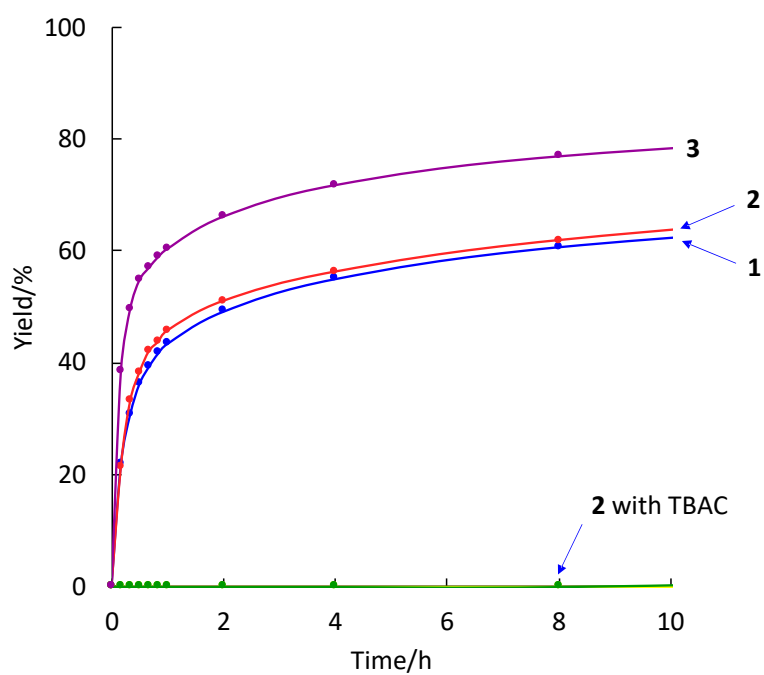

Figure S11. Plot of yield versus reaction time in the Ritter-like reaction of **1**, **2**, and **3** using  $\text{Te}(\text{CH}_3)\text{-TfO}$  (40 mol%).

## S5. Proof of chalcogen bonding interaction

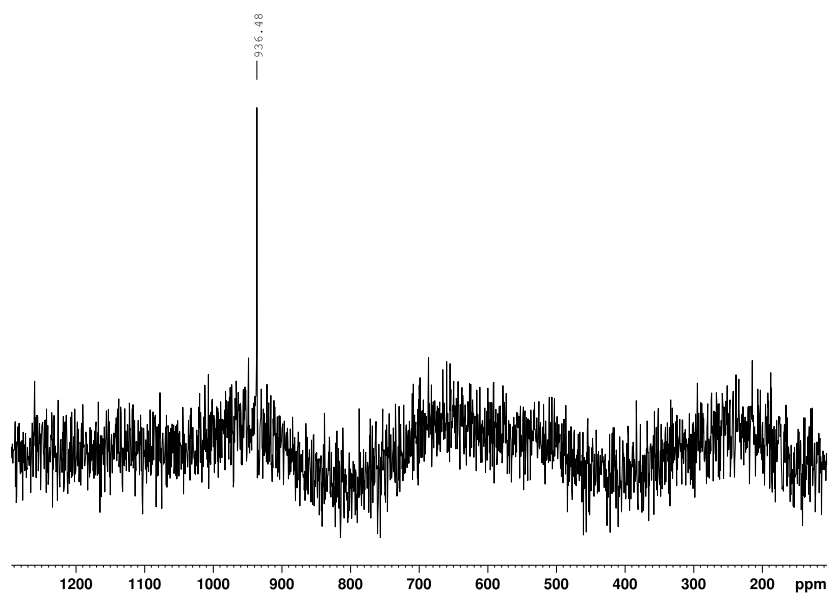

Figure S12.  $^{125}\text{Te}$  NMR spectrum of  $\text{Te}(\text{CH}_3)_3$  in wet  $\text{CD}_3\text{CN}$  with the addition of 1 equivalent of tetra-*n*-butylammonium chloride (TBAC).

## S6. Crystal structure analysis

A single crystal was mounted on a loop for the X-ray measurements. Diffraction data were collected on an X-ray diffractometer (Rigaku XtaLAB P200) equipped with a rotating-anode X-ray source (Mo  $K\alpha$ ,  $\lambda = 0.71075$  Å) and a hybrid photon-counting detector (PILATUS 200 K). The frame data were integrated, and absorption correction was calculated using the Rigaku CrystalClear program package. The structures were solved by SHELXT (ver. 2018/2) and refined by full-matrix least-squares fitting on  $F^2$  (SHELXL ver. 2018/3).<sup>6,7</sup> All non-hydrogen atoms were refined anisotropically and located on the calculated positions. Crystallographic data have been deposited with the Cambridge Crystallographic Data Center as supplementary publication numbers CCDC 2112083. The data can be obtained free of charge from the Cambridge Crystallographic Data Center via [www.ccdc.cam](http://www.ccdc.cam). Partially occupied or highly disordered solvents located in two equivalent voids in the asymmetric unit were not modeled. Reflection contributions from these solvents were fixed and added to the calculated structure factors using the SQUEEZE function of PLATON program,<sup>8</sup> which determined to be 50 electrons in 268 Å<sup>3</sup> accounted for per unit cell. Because the exact identity and amount of solvents could not be identified, no solvent was included in the atom list or molecular formula. One of counter anions (containing S1 atom) was treated as ordered, and the other (containing S2, S3 atom) was treated as disordered. The latter anion had 0.5 of occupancies for each component. The CF<sub>3</sub> group on the benzene ring (C1–C6) bound to Te1 was treated as disordered, and it had 0.5 of occupancies for each component. The benzene ring (C8–C13) bound to Te1 was treated as disordered along with CF<sub>3</sub>, and they had about 0.5 of occupancies for each component. The C–C bonds of benzene ring were constrained with an AFIX 66 command. The benzene ring (C36–C41) bound to Te3 was treated as disordered along with CF<sub>3</sub>, and the occupancy factors of the major components were refined to be 0.60.

Table S1. Crystallographic parameters for the structure of **3Te(CF<sub>3</sub>)-TfO**.

|                                       |                                                                                               |
|---------------------------------------|-----------------------------------------------------------------------------------------------|
| Formula                               | C <sub>44</sub> H <sub>24</sub> F <sub>24</sub> O <sub>8</sub> S <sub>2</sub> Te <sub>3</sub> |
| $M_r$                                 | 1583.55                                                                                       |
| Crystal system                        | triclinic                                                                                     |
| Space group                           | <i>P</i> -1                                                                                   |
| $a / \text{\AA}$                      | 12.4890(3)                                                                                    |
| $b / \text{\AA}$                      | 15.9524(4)                                                                                    |
| $c / \text{\AA}$                      | 16.1392(3)                                                                                    |
| $a / \text{deg}$                      | 63.246(2)                                                                                     |
| $b / \text{deg}$                      | 87.5183(17)                                                                                   |
| $g / \text{deg}$                      | 89.9450(19)                                                                                   |
| $V / \text{\AA}^3$                    | 2867.88(12)                                                                                   |
| $Z$                                   | 2                                                                                             |
| $Z'$                                  | 1                                                                                             |
| Temperature / <i>K</i>                | 93                                                                                            |
| Goodness-of-fit on $F^2$              | 1.046                                                                                         |
| $R_1 [I > 2\sigma(I)]$ on $F$         | 0.0475                                                                                        |
| $wR_2$ (all data) on $F^2$            | 0.1229                                                                                        |
| Reflection collected (all data)       | 46206                                                                                         |
| No. of reflections $[I > 2\sigma(I)]$ | 9365                                                                                          |
| $R_{\text{int}}$                      | 0.0532                                                                                        |
| Abs. corr.                            | multi-scan                                                                                    |
| Radiation type                        | Mo $K\alpha$ ( $\lambda = 0.71075 \text{ \AA}$ )                                              |
| $T_{\text{min}}$                      | 0.808                                                                                         |
| $T_{\text{max}}$                      | 0.983                                                                                         |
| $2\theta_{\text{max}}$                | 27.499                                                                                        |
| $\mu / \text{mm}^{-1}$                | 1.713                                                                                         |

Hydrolytic decomposition

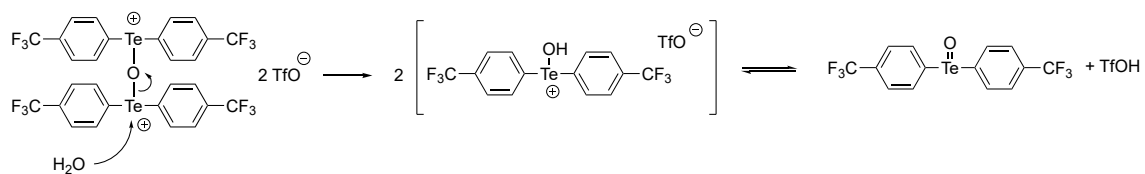

Chain extension

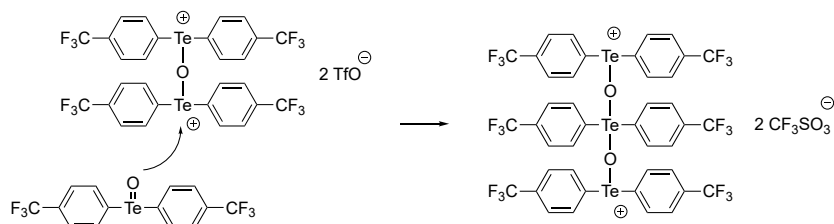

Scheme S3. Plausible route for producing dicationic tritelluroxane from **2Te(CF<sub>3</sub>)-TfO**.

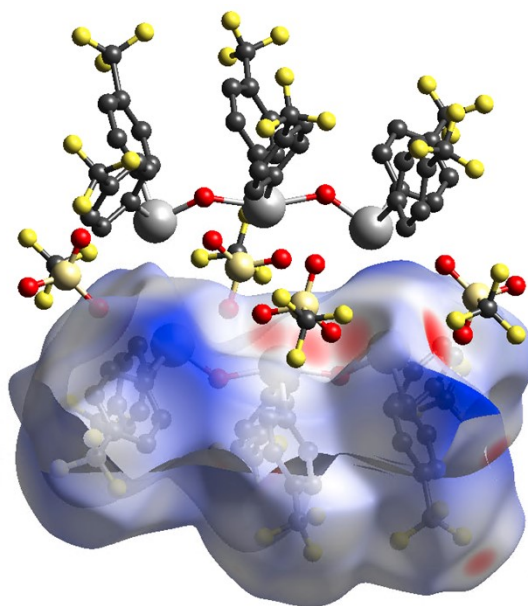

Figure S13. Three-dimensional Hirshfeld surface of a pair of **3Te(CF<sub>3</sub>)-TfO** molecules mapped with  $d_{\text{norm}}$  function. One can notice red areas which correspond to the ChB interaction formed between the triflate oxygen and tellurium atoms.

## S7. Theoretical calculation

Density functional theory (DFT) calculations were performed using computers at Research Center for Computational Science, Okazaki, Japan. Gaussian 09 (Revision E.01)<sup>9</sup> was used for the calculations. The geometries of  $[p\text{-MeC}_6\text{H}_4)_2\text{TeOH}]^+$  and its complex with substrate were optimized using the B3LYP and  $\omega\text{B97XD}$ <sup>10</sup> functionals, respectively. The DGDZVP basis set<sup>11</sup> was used for the tellurium atom and the 6-311G(d,p) basis set was used for other atoms in the calculations. Vibrational analysis was carried out for the optimized geometries demonstrating that all the optimized geometries correspond to energy minimum structures. The interaction energy was evaluated using the  $\omega\text{B97XD}$  functional with the basis set superposition error (BSSE) corrected by the counterpoise method.

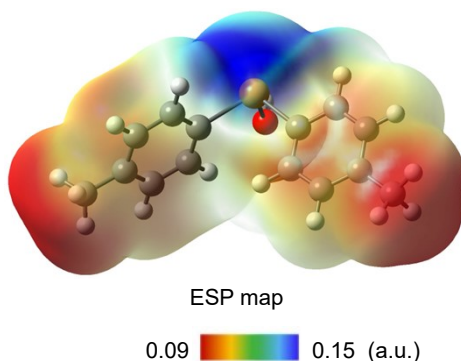

Figure S14. ESP map of  $[(p\text{-MeC}_6\text{H}_4)_2\text{TeOH}]^+$ .

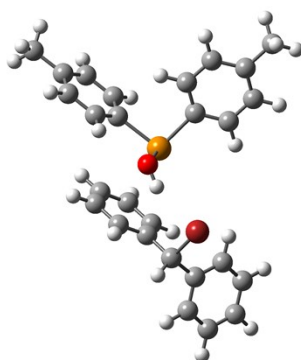

Figure S15. Optimized structure of complex.

### Computational data

Optimized geometry of  $[(p\text{-MeC}_6\text{H}_4)_2\text{TeOH}]^+$

|    |         |         |         |
|----|---------|---------|---------|
| C  | 0.1764  | -0.1105 | -0.0229 |
| Te | 2.0511  | -0.122  | 0.0157  |
| C  | -0.5067 | 1.0194  | -0.4754 |

|   |         |         |         |
|---|---------|---------|---------|
| C | -0.5602 | -1.2127 | 0.4138  |
| C | -1.9535 | -1.1925 | 0.3867  |
| C | -1.8999 | 1.0452  | -0.5034 |
| C | -2.6264 | -0.0628 | -0.0734 |
| H | -0.0461 | -2.1147 | 0.7862  |
| H | -2.5247 | -2.0707 | 0.7324  |
| H | 0.0524  | 1.9068  | -0.8172 |
| H | -2.4283 | 1.9436  | -0.865  |
| C | -4.1198 | -0.0381 | -0.1013 |
| C | 2.6872  | -1.8642 | -0.2642 |
| C | 2.2756  | -2.5945 | -1.3805 |
| C | 3.5803  | -2.4536 | 0.6321  |
| C | 4.0513  | -3.7482 | 0.421   |
| C | 2.743   | -3.8897 | -1.5962 |
| C | 3.6326  | -4.4696 | -0.6946 |
| H | 3.9249  | -1.9006 | 1.5218  |
| H | 4.7563  | -4.2028 | 1.1375  |
| H | 1.5715  | -2.1516 | -2.105  |
| H | 2.4086  | -4.4565 | -2.4816 |
| C | 4.1354  | -5.8575 | -0.9234 |
| O | 2.6279  | 0.5107  | 1.6557  |
| H | 3.3951  | 1.074   | 1.5317  |
| H | 5.2312  | -5.8308 | -1.0155 |
| H | 3.8459  | -6.4885 | -0.0702 |
| H | 3.6907  | -6.2514 | -1.8492 |
| H | -4.4793 | -0.8496 | -0.7511 |
| H | -4.4994 | -0.1803 | 0.9213  |
| H | -4.4546 | 0.9333  | -0.4941 |

SCF Done: E(RB3LYP) = -7231.25654557 a.u.

Optimized geometry of complex

|    |        |         |         |
|----|--------|---------|---------|
| C  | 1.6338 | -0.1299 | -0.113  |
| Te | 0.0545 | -1.5207 | -0.2169 |
| C  | 2.8963 | -0.5627 | -0.5382 |
| C  | 1.4383 | 1.1715  | 0.3605  |
| C  | 2.5263 | 2.0298  | 0.4243  |

|   |         |         |         |
|---|---------|---------|---------|
| C | 3.9693  | 0.3153  | -0.4667 |
| C | 3.8063  | 1.6203  | 0.0181  |
| H | 0.459   | 1.514   | 0.6706  |
| H | 2.3809  | 3.0394  | 0.7918  |
| H | 3.0508  | -1.5658 | -0.9202 |
| H | 4.9474  | -0.0165 | -0.7955 |
| C | 4.9787  | 2.5564  | 0.1201  |
| C | -1.6392 | -0.2408 | -0.13   |
| C | -2.2374 | 0.1599  | -1.3266 |
| C | -2.1439 | 0.1543  | 1.1082  |
| C | -3.2622 | 0.9825  | 1.1347  |
| C | -3.3499 | 0.9909  | -1.2714 |
| C | -3.8816 | 1.4142  | -0.0452 |
| H | -1.6856 | -0.1822 | 2.0299  |
| H | -3.6602 | 1.2952  | 2.0936  |
| H | -1.8561 | -0.1587 | -2.2908 |
| H | -3.8159 | 1.3098  | -2.1969 |
| C | -5.1089 | 2.2848  | -0.0011 |
| O | 0.0212  | -1.955  | 1.735   |
| H | -0.1279 | -2.902  | 1.8723  |
| H | -6.0126 | 1.6728  | -0.0909 |
| H | -5.1761 | 2.8352  | 0.9383  |
| H | -5.1182 | 3.0021  | -0.8239 |
| H | 4.6766  | 3.5938  | -0.0333 |
| H | 5.427   | 2.4903  | 1.1175  |
| H | 5.7547  | 2.3087  | -0.6055 |
| C | -0.4834 | -5.9674 | -1.8212 |
| H | -0.1353 | -6.5735 | -0.9861 |
| C | -1.9385 | -6.2826 | -2.0785 |
| C | -2.4928 | -6.2339 | -3.3548 |
| C | -2.751  | -6.6424 | -1.0023 |
| C | -3.8366 | -6.5301 | -3.5484 |
| H | -1.8724 | -5.9763 | -4.2046 |
| C | -4.0914 | -6.9388 | -1.1951 |
| H | -2.3281 | -6.6761 | -0.0032 |
| C | -4.6393 | -6.8815 | -2.4719 |

|    |         |         |         |
|----|---------|---------|---------|
| H  | -4.2552 | -6.4906 | -4.5476 |
| H  | -4.7103 | -7.2145 | -0.3489 |
| H  | -5.6871 | -7.1133 | -2.6254 |
| C  | 0.4374  | -6.1836 | -2.9975 |
| C  | 0.6594  | -5.2216 | -3.9802 |
| C  | 1.034   | -7.436  | -3.1327 |
| C  | 1.4597  | -5.5097 | -5.0778 |
| H  | 0.2143  | -4.2389 | -3.8773 |
| C  | 1.8349  | -7.7248 | -4.2298 |
| H  | 0.866   | -8.1945 | -2.3749 |
| C  | 2.0494  | -6.7611 | -5.2067 |
| H  | 1.6276  | -4.7494 | -5.832  |
| H  | 2.2951  | -8.7024 | -4.3173 |
| H  | 2.6788  | -6.9819 | -6.0611 |
| Br | -0.3324 | -4.1241 | -1.0913 |

SCF Done: E(RωB97XD) = -10307.3295699 a.u.

## S8. References

- 1) K. Kobayashi, N. Deguchi, E. Horn and N. Furukawa, *Angew. Chem. Int. Ed.*, 1998, **37**, 984–986.
- 2) J. Beckmann, D. Dakternieks, A. Duthie, N. A. Lewcenko, C. Mitchell and M. Schürmann, *Z. Anorg. Allg. Chem.*, 2005, **631**, 1856–1862.
- 3) K. Kobayashi, K. Tanaka, H. Izawa, Y. Arai and N. Furukawa, *Chem. Eur. J.*, 2001, **7**, 4272–4279.
- 4) K. Kobayashi, N. Deguchi, O. Takahashi, K. Tanaka, E. Horn, O. Kikuchi and N. Furukawa, *Angew. Chem. Int. Ed.*, 1999, **38**, 1638–1640.
- 5) L. Engman and J. Persson, *Synth. Commun.*, 1993, **23**, 445–458.
- 6) Sheldrick, G. M. SHELXT: Integrating space group determination and structure solution. *Acta Crystallogr.* **2014**, *A70*, C1437.
- 7) Sheldrick, G. M. Crystal structure refinement with SHELXL. *Acta Crystallogr.* **2015**, *C71*, 3–8.
- 8) Spek, A. L. PLATON SQUEEZE: a tool for the calculation of the disordered solvent contribution to the calculated structure factors. *Acta Cryst. Sect. C*, **2015**, *71*, 9–18.
- 9) Gaussian 09, Revision E.01, M. J. Frisch, G. W. Trucks, H. B. Schlegel, G. E. Scuseria, M. A. Robb, J. R. Cheeseman, G. Scalmani, V. Barone, B. Mennucci, G. A. Petersson, H. Nakatsuji, M. Caricato, X. Li, H. P. Hratchian, A. F. Izmaylov, J. Bloino, G. Zheng, J. L. Sonnenberg, M. Hada, M. Ehara, K. Toyota, R. Fukuda, J. Hasegawa, M. Ishida, T. Nakajima, Y. Honda, O. Kitao, H. Nakai, T. Vreven, J. A. Montgomery, Jr., J. E. Peralta, F. Ogliaro, M. Bearpark, J. J. Heyd, E. Brothers, K. N. Kudin, V. N. Staroverov, T. Keith, R. Kobayashi, J. Normand, K. Raghavachari, A. Rendell, J. C. Burant, S. S. Iyengar, J. Tomasi, M. Cossi, N. Rega, J. M. Millam, M. Klene, J. E. Knox, J. B. Cross, V. Bakken, C. Adamo, J. Jaramillo, R. Gomperts, R. E. Stratmann, O. Yazyev, A. J. Austin, R. Cammi, C. Pomelli, J. W. Ochterski, R. L. Martin, K. Morokuma, V. G. Zakrzewski, G. A. Voth, P. Salvador, J. J. Dannenberg, S. Dapprich, A. D. Daniels, O. Farkas, J. B. Foresman, J. V. Ortiz, J. Cioslowski, and D. J. Fox, Gaussian, Inc., Wallingford CT, 2013.
- 10) J.-D. Chai and M. Head-Gordon, *Phys. Chem. Chem. Phys.* 2008, **10**, 6615–6620.
- 11) N. Godbout, D. R. Salahub, J. Andzelm and E. Wimmer, *Can. J. Chem.* 1992, **70**, 560–571.
